## Rapid detection of copy number variations and point mutations in *BRCA1/2* genes using a single workflow by ion semiconductor sequencing pipeline

Aldo Germani<sup>1,2</sup>, Fabio Libi<sup>2</sup>, Stefano Maggi<sup>2,3</sup>, Gianluca Stanzani<sup>2</sup>, Augusto Lombardi<sup>2,3</sup>, Patrizia Pellegrini<sup>1,2</sup>, Mauro Mattei<sup>2</sup>, Laura De Marchis<sup>4</sup>, Claudio Amanti<sup>2,3</sup>, Antonio Pizzuti<sup>5,6</sup>, Maria Rosaria Torrisi<sup>1,2</sup> and Maria Piane<sup>1,2</sup>

<sup>1</sup>Department of Clinical and Molecular Medicine, "Sapienza" University of Rome, Rome, Italy

<sup>2</sup>Sant'Andrea University Hospital, Rome, Italy

<sup>3</sup>Department of Medical and Surgical Sciences and Translational Medicine, Rome, Italy

<sup>4</sup>Department of Radiation, Anatomopathological, Oncological Science, "Sapienza" University of Rome, Rome, Italy

<sup>5</sup>Department of Experimental Medicine, "Sapienza" University of Rome, Rome, Italy

<sup>6</sup>Clinical Genomics Unit, IRCCS Casa Sollievo della Sofferenza, San Giovanni Rotondo, Italy

**Correspondence to:** Maria Piane, **email:** maria.piane@uniroma1.it

**Keywords:** CNV; NGS; MLPA; MAQ; *BRCA* genes

**Received:** May 30, 2018

**Accepted:** August 04, 2018

**Published:** September 14, 2018

**Copyright:** Germani et al. This is an open-access article distributed under the terms of the Creative Commons Attribution License 3.0 (CC BY 3.0), which permits unrestricted use, distribution, and reproduction in any medium, provided the original author and source are credited.

### ABSTRACT

**Molecular analysis of *BRCA1* (MIM# 604370) and *BRCA2* (MIM #600185) genes is essential for familial breast and ovarian cancer prevention and treatment. An efficient, rapid, cost-effective accurate strategy for the detection of pathogenic variants is crucial. Mutations detection of *BRCA1/2* genes includes screening for single nucleotide variants (SNVs), small insertions or deletions (indels), and Copy Number Variations (CNVs). Sanger sequencing is unable to identify CNVs and therefore Multiplex Ligation Probe amplification (MLPA) or Multiplex Amplicon Quantification (MAQ) is used to complete the *BRCA1/2* genes analysis. The rapid evolution of Next Generation Sequencing (NGS) technologies allows the search for point mutations and CNVs with a single platform and workflow. In this study we test the possibilities of NGS technology to simultaneously detect point mutations and CNVs in *BRCA1/2* genes, using the OncoPrint™ *BRCA* Research Assay on Personal Genome Machine (PGM) Platform with Ion Reporter Software for sequencing data analysis (Thermo Fisher Scientific). Comparison between the NGS-CNVs, MLPA and MAQ results shows how the NGS approach is the most complete and fast method for the simultaneous detection of all *BRCA* mutations, avoiding the usual time consuming multistep approach in the routine diagnostic testing of hereditary breast and ovarian cancers.**

### INTRODUCTION

Most cases of breast and ovarian cancers are sporadic. However, up to 20% of patients are likely to harbor a dominant susceptibility allele, with highly increased risk of malignancy above the general population. Many genes, when mutated, increase risk of breast cancer development [1]. Some of them work either as cell cycle controllers in response to DNA damage or in DNA Double-Strand Breaks

Repair by homologous recombination; however, the most part of them have low or moderate penetrance, and are rarely involved. Notable exceptions are the *BRCA1* and the *BRCA2* genes, whose mutations have high penetrance and are found in nearly 40% of cancer patients [2–4]. Cumulative cancer risks at age 70 years were breast cancer risk of 57% for *BRCA1* and 49% for *BRCA2* mutation carriers; and ovarian cancer risk of 40% for *BRCA1* and 18% for *BRCA2* mutation carriers. [5, 6]. *BRCA1* and

**Table 1: Indel and SNV variants detected by OncoPrint™ BRCA Panel**

| Gene         | Transcript  | Locus          | Coding             | Protein           | Function            | dbSNP       | Clinical Significance  | Enigma Classification | Sample ID |
|--------------|-------------|----------------|--------------------|-------------------|---------------------|-------------|------------------------|-----------------------|-----------|
| <i>BRCA1</i> | NM_007294.3 | chr17:41267797 | c.81-1G>C          | p.?               | unknown             | rs80358018  | Pathogenic             | C 5                   | P17       |
| <i>BRCA1</i> | NM_007294.3 | chr17:41243725 | c.3823A>G          | p.Ile1275Val      | missense            | rs80357280  | Uncertain significance | C 3                   | P05       |
| <i>BRCA1</i> | NM_007294.3 | chr17:41245667 | c.1881C>G          | p.Val627Val       | synonymous          | rs80356838  | Uncertain significance | C 3                   | P07       |
| <i>BRCA1</i> | NM_007294.3 | chr17:41244526 | c.3018_3021delTTCA | p.His1006Glnfs*17 | frameshiftDeletion  | rs80357749  | Pathogenic             | C 5                   | P08       |
| <i>BRCA1</i> | NM_007294.3 | chr17:41243788 | c.3756_3759delGTCT | p.Ser1253Argfs*10 | frameshiftDeletion  | rs80357868  | Pathogenic             | C 5                   | P11       |
| <i>BRCA1</i> | NM_007294.3 | chr17:41244262 | c.3285delA         | p.Lys1095Asnfs*14 | frameshiftDeletion  | rs397509051 | Pathogenic             | C 5                   | P16       |
| <i>BRCA1</i> | NM_007294.3 | chr17:41228628 | c.4361T>C          | p.Val1454Ala      | missense            | rs587782606 | Uncertain significance | C 3                   | P13       |
| <i>BRCA1</i> | NM_007294.3 | chr17:41209079 | c.5266dupC         | p.Gln1756Profs*74 | frameshiftInsertion | rs80357906  | Pathogenic             | C 5                   | P04       |
| <i>BRCA1</i> | NM_007294.3 | chr17:41215920 | c.5123C>A          | p.Ala1708Glu      | missense            | rs28897696  | Pathogenic             | C 5                   | P10       |
| <i>BRCA2</i> | NM_000059.3 | chr13:32905069 | c.700delT          | p.Ser234Profs*7   | frameshiftDeletion  | rs80359630  | Pathogenic             | C 5                   | P12       |
| <i>BRCA2</i> | NM_000059.3 | chr13:32907102 | c.1487C>T          | p.Ser496Phe       | missense            | rs397507269 | Uncertain significance | C 3                   | P01       |
| <i>BRCA2</i> | NM_000059.3 | chr13:32906458 | c.846_847delCA     | p.Ile283Trpfs*11  | frameshiftDeletion  | rs886040776 | Pathogenic             | C 5                   | P15       |
| <i>BRCA2</i> | NM_000059.3 | chr17:32913381 | c.4889C>G          | p.Ser1630Ter      | nonsense            | rs80358711  | Pathogenic             | C 5                   | P18       |
| <i>BRCA2</i> | NM_000059.3 | chr13:32915053 | c.6566dupA         | p.Asn2189Lysfs*8  | frameshiftInsertion | rs397507373 | Pathogenic             | C 5                   | P02       |
| <i>BRCA2</i> | NM_000059.3 | chr13:32914953 | c.6468_6469delTC   | p.Gln2157Ilefs*18 | frameshiftDeletion  | rs80359596  | Pathogenic             | C 5                   | P09       |
| <i>BRCA2</i> | NM_000059.3 | chr13:32944593 | c.8386C>T          | p.Pro2796Ser      | missense            | rs146120136 | Uncertain significance | C 3                   | P14       |

**Abbreviations:** dbSNP: Single Nucleotide Polymorphisms database ([www.ncbi.nlm.nih.gov/SNP/](http://www.ncbi.nlm.nih.gov/SNP/)); ENIGMA (Evidence-based Network for the Interpretation of Germline Mutant Alleles) <http://www.enigmaconsortium.org/>; C5: Class 5 – (there is significant evidence to suggest that this variant is a dominant high-risk pathogenic variant, C3: Class 3 (there is insufficient evidence, molecular or otherwise, to be classified as a high-risk pathogenic variant, thus requires further investigation).

*BRCA2* pathogenic variants include point mutation, small insertion/deletion and large genomic rearrangements (LGRs). Copy Number Variation (CNV) is a structural variation where a DNA segment of 1Kb to several Mb in length is present in variable copies compared to a reference genome sequence [7]. Although these structural variants do not always display phenotypic consequences, sometimes they may influence gene expression and be associated with specific phenotypes [8]. LGRs are responsible for 4-28% of all inherited *BRCA* mutations [9–11]. Pathogenic CNVs in *BRCA1* and *BRCA2* genes range respectively from 0 to 27% and 0% to 8% [12–14]. The higher frequency of LGRs in *BRCA1* compared to *BRCA2* gene is caused by higher density of *ALU* sequences [15], which mediate the formation of LGRs [16, 17]. LGRs in *BRCA1* and *BRCA2* vary across populations and ethnicities [18–20], with a frequency up to 12% in Italy [21]. Many approaches have been used for detecting *BRCA* LGRs, such as comparative genomic hybridization (CGH), array comparative genomic hybridization (aCGH), real Time PCR (qPCR) and fluorescent in situ Hybridization (FISH) [22]. In 2006, a test for identifying large rearrangements in these genes (BRAC-Analysis Rearrangement Testing) was released from Myriad. Nowadays, the Multiplex ligation-dependent probe amplification (MLPA, MRC-Holland, Amsterdam, the Netherlands) is the primary method for detecting LGRs in *BRCA1/2* with the Multiplex Amplicon Quantification (MAQ) (Multiplicon, Niel, Belgium), as an alternative way [23–25]. Both approaches are consistent, but they always need the confirmation with other techniques, because of

the possibility of false positive results [21]. For many years, *BRCA* gene analysis on peripheral blood has been using Sanger sequencing and MLPA. The Next Generation Sequencing (NGS) had definitively replaced the Sanger method since it is extremely fast and cost-effective as a routine analysis. The rapid evolution of NGS allows to add LGRs to point mutation screening in a single workflow, further reducing the time for the complete analysis of *BRCA1/2* genes. However, NGS-CNV detection has not been validated for clinical diagnostics yet [26, 27]. In this work we evaluated the use of the PGM Ion Torrent platform for the simultaneous identification of CNVs, single nucleotide variants (SNVs) and indels (single or multiple insertion/deletion), using a single integrated workflow. Data obtained from the NGS-CNV detection have been compared with those achieved by MLPA and MAQ. The results show how the NGS workflow on the Ion PGM platform can be used for the identification of any type of pathogenic variants of the *BRCA1/2* genes. This analysis pipeline could be used in diagnostic and predictive tests for hereditary breast and ovary cancer, as this approach proved to be fast, reliable and accurate both in identifying SNVs and indels, and in the simultaneous analysis of CNVs.

## RESULTS

### Mutational data

DNA was analyzed for point mutations and CNVs by a single workflow. PGM sequencing produced an

**Table 2: Large rearrangements detected by NGS-CNV analysis in P03, P06 and P19 patients**

| Sample ID | Locus                 | Type | CNV Subtype   | Call              | Genes        | CytoBand                             | Length         | Variant Class        | Copy Number | CNV Confidence |
|-----------|-----------------------|------|---------------|-------------------|--------------|--------------------------------------|----------------|----------------------|-------------|----------------|
| P03       | chr13:32890490        | CNV  | REF           | exon 2-27         | <i>BRCA2</i> | 13q13.1(32890490-32972932)x2         | 82.442kb       |                      | 2           | 100            |
|           | <b>chr17:41197601</b> | CNV  | <b>BigDel</b> | <b>exon 24</b>    | <i>BRCA1</i> | <b>17q21.31(41197601-41197870)x1</b> | <b>269kb</b>   | <b>exon deletion</b> | <b>1</b>    | <b>30.53</b>   |
|           | chr17:41199538        | CNV  | REF           | exon 2-23         | <i>BRCA1</i> | 17q21.31(41199538-41276123)x2        | 76.585kb       |                      | 2           | 100            |
| P06       | chr13:32890490        | CNV  | REF           | exon 2-27         | <i>BRCA2</i> | 13q13.1(32890490-32972932)x2         | 82.442kb       |                      | 2           | 100            |
|           | chr17:41197601        | CNV  | REF           | exon 21-24        | <i>BRCA1</i> | 17q21.31(41197601-41203234)x2        | 5.633kb        |                      | 2           | 69.58          |
|           | <b>chr17:41208956</b> | CNV  | <b>BigDel</b> | <b>exon 20</b>    | <i>BRCA1</i> | <b>17q21.31(41208956-41209231)x1</b> | <b>275kb</b>   | <b>exon deletion</b> | <b>1</b>    | <b>78.56</b>   |
|           | chr17:41215248        | CNV  | REF           | exon 2-19         | <i>BRCA1</i> | 17q21.31(41215248-41276123)x2        | 60.875kb       |                      | 2           | 100            |
| P19       | chr13:32890490        | CNV  | REF           | exon 2-27         | <i>BRCA2</i> | 13q13.1(32890490-32972932)x2         | 82.442kb       |                      | 2           | 100            |
|           | chr17:41197601        | CNV  | REF           | exon 23-24        | <i>BRCA1</i> | 17q21.31(41197601-41199764)x2        | 2.163kb        |                      | 2           | 34.61          |
|           | <b>chr17:41201009</b> | CNV  | <b>BigDel</b> | <b>exon 21-22</b> | <i>BRCA1</i> | <b>17q21.31(41201009-41203234)x1</b> | <b>2.225kb</b> | <b>exon deletion</b> | <b>1</b>    | <b>100</b>     |
|           | chr17:41208956        | CNV  | REF           | exon 2-20         | <i>BRCA1</i> | 17q21.31(41208956-41276123)x2        | 67.167kb       |                      | 2           | 100            |

**Abbreviations:** REF: read count matches with the reference baseline; BigDel: deletion of at least one exon; CNV confidence: The confidence score is the probability that the number of copies of the region of interest is different from 2, which is the normal value. A high confidence score indicates a higher probability that the identified variant is a true positive. A confidence score of 10 or 20 or higher indicates a high quality copy number variant's call.

average of 244,000 reads per patients, the mean read length being 110 bp. The average read depth per sample was 1220X, with a mean percentage of reads on target of 95%. The mean percentage of regions of interest (ROI) covered at least by 100X was 100%, and uniformity of base coverage by 99.5%. Details for each samples of the sequencing metrics are reported in Supplementary Table 1. Among 81 women with breast cancer who pursued genetic testing, 19 allelic variants were identified (detection rate 23%), 14 pathogenic (P) variants (74%, 14/19) including one splicing site mutation, one nonsense, one missense, 9 frameshifts, and three CNVs, all reported in the BRCA Exchange database (<http://brcaexchange.org/>); five mutations are classified as variants of uncertain significance (VUS) (Table 1). All samples analyzed for CNVs by the VCIB (Variability Correction Informatics Baseline) algorithm showed a confidence score > 20, indicating a high quality call of CNVs (Table 2). All results obtained by NGS-CNV detection were confirmed by MLPA (Supplementary Figure 1). Sixty-nine samples out 81 were negative for big indels (Supplementary Figure 2), while three samples (about 4%) showed an exon 20 deletion, exons 21 to 22 deletion and exon 24 deletion on the *BRCA1* gene respectively, with relative peak ratio (RPR) values about 0.5 (normal range 0.7-1.3). The identified CNVs were confirmed by the MAQ test, the dosage quotient (DQ) values were 0,57 for exon 20 deletion, 0,53-0,51 for exon 21-22 deletion and 0,53 for exon 24 deletion (normal range 0.75-1.3). Comparison

between the results obtained through NGS-CNVs, MLPA and MAQ technology are summarized in Figure 1.

### Performance of the single workflow for SNVs, indels and CNVs detection

The single Oncomine workflow used for *BRCA1/2* genetic test allowed us to detect simultaneous all type of variants on *BRCA1/2* genes. Using this single integrated workflow on single platform, turnaround time of mutation testing was reduced. This approach allows to a single technician to perform the complete *BRCA1/2* analysis in a series of 16 patients (collected in two weeks) making the diagnostic reports available for the clinician in 25 working days following blood sampling, compared to 45 days required with separate workflows for point mutations and CNVs. To assess the sensitivity and specificity in the detection of SNVs and indels, we compared the variant calling results from four DNA samples, pre-tested by Ion AmpliSeq Panel to detect germline variants, with the results obtained by Oncomine® *BRCA1/2* Panel. The comparison was restricted to the ROI regions (*BRCA1/2* coding regions +/- 20 bp) covered by both panels' designs. All variants previously called by Ion AmpliSeq panel were successfully confirmed using the Oncomine® *BRCA1/2* Panel, except for a false call in a homolymeric region of the *BRCA2* gene (Supplementary Table 2).

Finally, to check the performance of NGS-CNVs detection, all samples analyzed with VCIB algorithm

of Ion Reporter Server System 5.6, were re-analyzed by MLPA analysis. In addition, the CNVs identified in tree samples on *BRCA1* gene were analyzed by MAQ technique. CNV NGS data compared to MLPA and/or MAQ revealed a 100% of sensitivity, specificity and accuracy (Supplementary Table 3).

## DISCUSSION

The mutational spectrum of *BRCA1/2* is large, including different classes of variants, such as SNVs, indels and LGRs. Fast test results are crucial when patients with breast/ovarian cancer and their unaffected family members must be addressed to the appropriate therapy and surveillance respectively. Sanger sequencing and MLPA so far represented the gold standard for the complete *BRCA1/2* testing. However the possibility of analyzing all types of mutations through a single workflow offered by the NGS is appealing. Therefore several research groups have tested different NGS platforms for CNVs detection by implementing and validating customized workflow [21, 28-30].

In this study, we evaluated the possibility of using the PGM platform for the simultaneous analysis

of indels, SNVs, and CNVs in *BRCA1/2* genes, by the OncoPrint™ BRCA Research assay and Ion Reporter 5.6 Software, which includes two different algorithms for different classes of variant calling. The OncoPrint™ BRCA Panel replaced the previously used Ion Ampliseq™ Panel on the PGM platform for *BRCA1/2* diagnostic testing. Another study showed a better performance of the OncoPrint™ BRCA Research assay compared with the Ion Ampliseq™ BRCA Panel in terms of ability to identify deletions at homopolymer sites, on target mapped reads, reduction of low-quality mapped reads and false-negative results. In the same study, using the OncoPrint Panel a large deletion was identified, subsequently confirmed by MLPA [31]. The NGS-CNV analysis requires a complete validation of the "baseline", which is crucial to obtain accurate and reliable results for clinical applications. For this purpose, we used the VCIB algorithm to build the baseline and set up basic parameters. To validate NGS accuracy on CNV detection we selected forty-eight samples, without big indels on *BRCA1/2* genes when tested by MLPA. Using a single workflow, we identified on *BRCA1/2* genes three large rearrangements and 16 point mutations. The clinical features of *BRCA1/2* carriers mutations are summarized

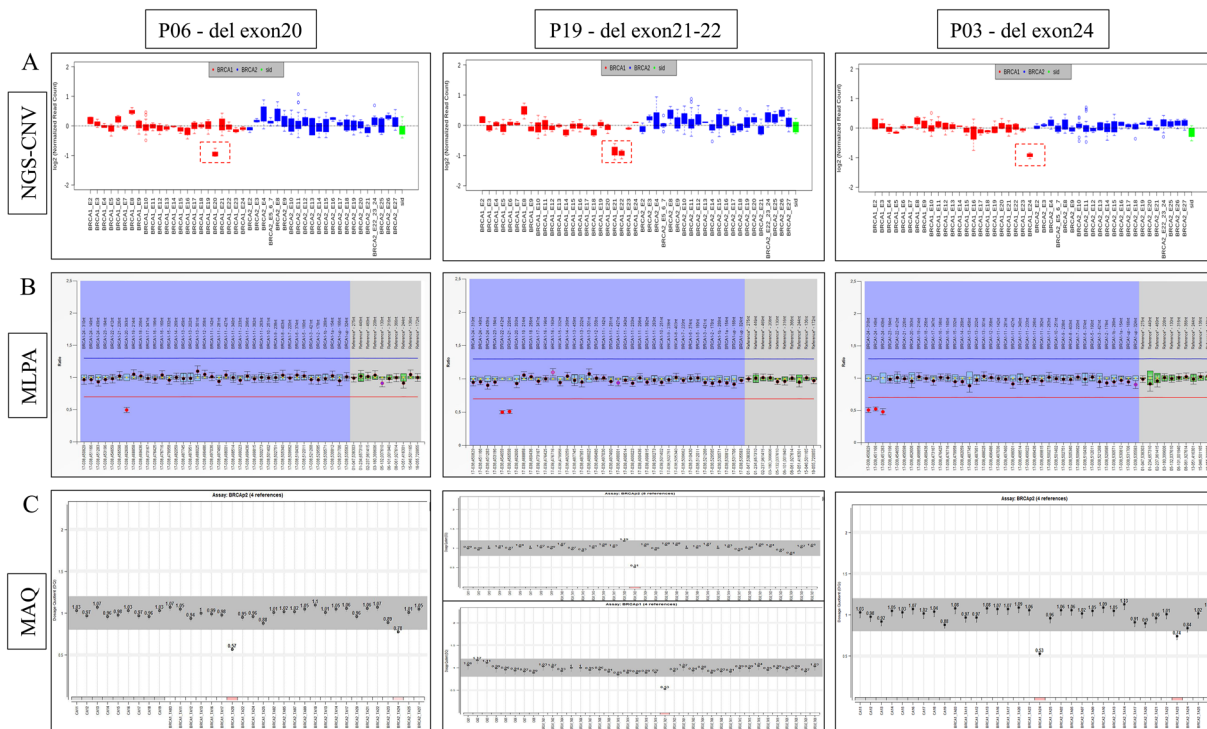

**Figure 1: Large rearrangements identified in P06, P19, P03 patients by NGS-CNV workflow respectively in exon 20, 21-22 and 24 of *BRCA1* gene compared with MLPA and MAQ results. (A) CNV-NGS representative images, the red box indicates the *BRCA1* exon deletion, exon 21-22 deletion and exon 24 deletion, sequencing reads of *BRCA1* (red) and *BRCA2* (blue) were normalized with sample ID (sid) tag sequencing reads (green). (B) MLPA results: the probes relative to exon 20, 21-22 and 24 show a RPR value about 0.5 compared to normal range value of reference probes (normal range : 0.7 – 1.3 red and blue line), blue rhombus represents the 95% confidence interval over the reference samples for each probe. The collected data were analyzed using Coffalyser.NET Software (MRC Holland). (C) MAQ results show the 0.57 DQ value relative to *BRCA1* exon 20, 0.53 and 0.51 for exon 21-22 and 0.53 for exon 24. The gray profiles are obtain on reference DNA sample, (normal range 0.75 – 1.3).**

in Supplementary Tables 4 and 5. Seventy-eight out of eighty-one samples were normal for *BRCA1/2* copy number variations (Figure 1, Supplementary Figure 2) Results obtained by the NGS-CNV algorithm were confirmed with MLPA and pathogenic CNVs were also confirmed with MAQ, with 100% concordance. For what concerns reduced costs, they have been mainly obtained by using a single protocol and reagents for the complete analysis of *BRCA1/2* genes. Moreover, the baseline implemented in the bioinformatics pipeline for the NGS-CNVs analysis does not need to insert additional control samples for each analysis, further reducing cost effective for a single sample; for the library preparations a very low input concentration of DNA is required compared with MLPA analysis. Using this workflow also the time of analysis has been drastically reduced obtaining two analyzes in a single solution and avoiding to introduce further errors and limiting contamination problems. We can conclude that NGS-CNV could be used as valid and safe alternative to MLPA assay; the NGS approach for CNV analysis could represent an effective procedure to apply to all patients in routine *BRCA1/2* molecular screening. Comprehensive and accurate analysis of *BRCA1/2* genes is essential for individual and family genetic counseling in hereditary breast and ovarian cancers [32], as well as for establishing drug therapy with poly(ADP-ribose) (PARP) polymerases inhibitors in patients with high-grade serous ovarian cancer [33, 34]. Therefore, reducing the timing of mutation screening becomes fundamental in clinical oncology. We confirm in this study the accuracy and precision of NGS workflow for simultaneous detection of CNVs and point mutations of *BRCA1/2* genes, suggesting the use of this technological advancement in the diagnostic-therapeutic and care assessment of hereditary breast and ovarian cancer.

## MATERIALS AND METHODS

### Patients

A consecutive series of 81 Italian women with breast/ovarian cancer and/or positive family history have been enrolled in this study between July and December 2017, after receiving genetic counseling at U.O.C Medical Genetics and Cellular Diagnostic of Department of Clinical and Molecular Medicine, “Sapienza” University of Rome. The eligibility of patients for *BRCA1/2* testing was evaluated using BRCAPRO 5.0 model (University of Texas <http://www.stat.duke.edu/~gp/brcapro.html>) and/or for the presence of specific anamnestic criteria based on Italian guidelines from the *Operational program 2016-2018, Lazio Region decree: DCA 52/201* that identify the high-risk woman for being *BRCA* mutation carriers. All tested individuals signed an informed consent for genetic

research. Investigation has been conducted in accordance with the 1964 Helsinki Declaration.

### Mutational analysis

A single NGS platform, the Personal Genome Machine (PGM) (Thermo Fisher Scientific, Carlsbad, CA, USA), has been used for the simultaneous detection of point mutations and CNVs in *BRCA1/2* genes. For this purpose OncoPrint™ BRCA Research Assay (Thermo Fisher Scientific), containing 265 primers pairs in two pools was performed according to the manufacturer's protocol on PGM machine. Genomic DNA was extracted from whole EDTA blood using a commercially available kit (Invitrogen, Pure link Genomic DNA by Thermo Fisher Scientific) and quantified using Qubit ds DNA HS Assay Kit on Qubit 3.0 Fluorimeter (Invitrogen). The detected variants are classified based on the criteria of the ENIGMA (Evidence-based Network for the Interpretation of Germline Mutant Alleles) consortium (<https://enigmaconsortium.org>) and described as recommended by Human Genome Variation Society (<https://www.hgvs.org/>) using as RefSeq: NM\_007294.2 and NM\_000059.3. Point mutations classified as P and VUS have been confirmed by Sanger sequencing, using the BigDye Terminator v3.1 sequencing kit and the ABI PRISM 3130 Genetic Analyzer (Life Technologies). To confirm the results obtained by NGS-CNV workflow, all the samples analyzed by Ion Reporter Software 5.6 were tested with Multiplex Ligation-dependent Probe Amplification (MLPA) and/or Multiplex Amplicon Quantification (MAQ).

*BRCA1/2* MLPA analysis was performed using P002-D1 and P045-C1 SALSA MLPA kits (MRC-Holland, Amsterdam, the Netherlands) in according to manufacturer's instructions. DNA samples were diluted to final 50ng/ul concentration, and four normal controls were included in each MLPA analysis. The fragments analysis was performed using 3130 Genetic Analyzer (Applied Biosystem) with size standard GeneScan TM 500 Liz. Variations in peaks areas were analyzed using Coffalyser.Net (MRC-Holland, Amsterdam, the Netherlands).

The MAQ (v1.0 kit, Multiplicon, Niel, Belgium) is a straightforward method for the detection and analysis of copy number variations (CNVs). It consists of the simultaneous PCR amplification of fluorescently labeled target amplicons of *BRCA1* and *BRCA2* exons followed by fragments analysis. The comparison of normalized peak area between test and reference sample results in a dosage quotient (DQ) indicating the copy of LGR. MAQ kit includes two Master reaction mix (Plex A and Plex B) containing primer for 55 *BRCA1/2* amplicons target (TA) and 17 control amplicons (CA). The fragment analysis was run on 3130 Genetic Analyzer (Applied Biosystem) and for analysis results was used the MAQ-S v2.0 software (Multiplicon, Niel Belgium).

## Library preparation

The OncoPrint™ Panel used for library preparation, cover 100% of the coding sequences of *BRCAl* and *BRCA2*, including all splice sites with an average of 64 bp extensions from the intron junctions. In accordance to the manufacturer's instructions, 10ng of DNA isolated from whole blood per target amplification reaction (20ng total) were used to generate the sequencing libraries with two premixed pools of 265 primers. Briefly, after target amplification in 10ul reactions, pool 1 and pool 2 amplification reactions are combined into new wells in the plate. After partial digestion of primers, ligation of barcode adapters, and amplicon purification, barcoded libraries are quantified and diluted to 100pM concentration, and combined before template preparation. Clonal amplification of the libraries was carried out by emulsion PCR using Ion PGM™ Hi-Q™ View OT2 Kit on Ion OneTouch 2 Instrument and the Ion OneTouch ES (Enrichment System) (Thermo Fisher Scientific) to produce high-quality Ion Sphere™ particles for use in combination with the Ion PGM™ Hi-Q™ View Sequencing Kit. Finally, the prepared libraries were then sequenced on an Ion PGM™ System platform, using Ion 316™ Chip v2 BC. Sequencing data analysis was performed using Torrent Suite version 5.0.5 and Ion Reporter version 5.6 (Thermo Fisher Scientific).

## SNVs, indel and CNVs detections

The Torrent Suite Software running in Torrent Server (DEL T7500 OS Ubuntu 10.04 LTS) has been used to process raw data acquired by PGM. The generated raw sequence data, in FASTQ format, have been aligned to the hg19 human reference genome using the Torrent Mapping Alignment Program. The base calls, in SFF and FASTQ file formats were used for downstream analysis, containing per-base quality scores. Following the analysis, the annotation of single nucleotide variants, indels and CNVs was performed using the Ion Reporter Server System v.5.6. The analysis of the CNVs required the setting of the integrated software for germline CNVs analysis. In the proprietary algorithm used to call copy number changes in individual exons, named VCIB (Variability Correction Informatics Baseline), has been inserted a baseline consisting of samples normal for *BRCAl/2* CNVs. The selection of samples for the baseline was made between those previously analyzed for all type of *BRCAl/2* mutations, using OncoPrint BRCA Panel for point mutations analysis on PGM and the MLPA for CNVs detection on Sanger sequencer. Among these, we selected 48 samples without big indels in the *BRCAl/2* genes, with a value of mapped reads > 100,000 and a MAPD (Median of the Absolute values of all Pairwise Differences) <0.5. The MAPD is a metric that evaluates whether panel data can be used for CNV analysis. The Copy Number

estimates are made by VCIB algorithm counting reads for each amplicon, making adjustments to account for certain types of variability like those derived from imbalance pool. The Sequence data were evaluated using Integrative Genomics Viewer (IGV) (<http://software.broadinstitute.org/software/igv/>).

## Abbreviations

BigDel: deletion of at least one exon; CNV: copy number variation; FISH: fluorescent in situ hybridization; INDEL: single or multiple insertion/deletion; LGR: large genomic rearrangement; MAPD: median of the Absolute values of all Pairwise Differences; MAQ: multiplex amplicon quantification; MLPA: multiplex ligation probe amplification; NGS: next generation sequencing; P: pathogenic; PARP: poly(ADP-ribose) polymerases; PGM: personal genome machine; REF: read count matches with the reference baseline; ROI: regions of interest; RPR: relative peak ratio; SNV: single nucleotide variant; VCIB: variability correction informatics baseline; VUS: variant of uncertain significance.

## ACKNOWLEDGMENTS

We thank Andrea Lucchetti for skillful technical assistance.

## CONFLICTS OF INTEREST

The authors have no conflicts of interest to declare.

## REFERENCES

1. Cobain EF, Milliron KJ, Merajver SD. Updates on breast cancer genetics: clinical implications of detecting syndromes of inherited increased susceptibility to breast cancer. *Semin Oncol.* 2016; 43:528–35. <https://doi.org/10.1053/j.seminoncol.2016.10.001>.
2. Baretta Z, Mocellin S, Goldin E, Olopade OI, Huo D. Effect of BRCA germline mutations on breast cancer prognosis: A systematic review and meta-analysis. *Medicine (Baltimore).* 2016; 95:e4975. <https://doi.org/10.1097/MD.0000000000004975>.
3. Bayraktar S, Arun B. BRCA mutation genetic testing implications in the United States. *Breast.* 2017; 31:224–32. <https://doi.org/10.1016/j.breast.2016.11.021>.
4. Shiovitz S, Korde LA. Genetics of breast cancer: a topic in evolution. *Ann Oncol.* 2015; 26:1291–99. <https://doi.org/10.1093/annonc/mdv022>.
5. Chen S, Parmigiani G. Meta-analysis of BRCA1 and BRCA2 penetrance. *J Clin Oncol.* 2007; 25:1329–33. <https://doi.org/10.1200/JCO.2006.09.1066>.
6. Mavaddat N, Peock S, Frost D, Ellis S, Platte R, Fineberg E, Evans DG, Izatt L, Eeles RA, Adlard J, Davidson R,

- Eccles D, Cole T, et al, and EMBRACE. Cancer risks for BRCA1 and BRCA2 mutation carriers: results from prospective analysis of EMBRACE. *J Natl Cancer Inst.* 2013; 105:812–22. <https://doi.org/10.1093/jnci/djt095>.
7. Feuk L, Carson AR, Scherer SW. Structural variation in the human genome. *Nat Rev Genet.* 2006; 7:85–97. <https://doi.org/10.1038/nrg1767>.
  8. Gamazon ER, Stranger BE. The impact of human copy number variation on gene expression. *Brief Funct Genomics.* 2015; 14:352–57. <https://doi.org/10.1093/bfpg/elv017>.
  9. Hansen T, Jonson L, Albrechtsen A, Andersen MK, Ejlersen B, Nielsen FC. Large BRCA1 and BRCA2 genomic rearrangements in Danish high risk breast-ovarian cancer families. *Breast Cancer Res Treat.* 2009; 115:315-23 <https://doi.org/10.1007/s10549-008-0088-0>.
  10. Concolino P, Rizza R, Hackmann K, Minucci A, Scaglione GL, De Bonis M, Costella A, Zuppi C, Schrock E, Capoluongo E. Identification and Characterization of a New BRCA2 Rearrangement in an Italian Family with Hereditary Breast and Ovarian Cancer Syndrome. *Mol Diagn Ther.* 2017; 21:539–45. <https://doi.org/10.1007/s40291-017-0288-6>.
  11. Sluiter MD, van Rensburg EJ. Large genomic rearrangements of the BRCA1 and BRCA2 genes: review of the literature and report of a novel BRCA1 mutation. *Breast Cancer Res Treat.* 2011; 125:325–49. <https://doi.org/10.1007/s10549-010-0817-z>.
  12. Lahti-Domenici J, Rapakko K, Pääkkönen K, Allinen M, Nevanlinna H, Kujala M, Huusko P, Winqvist R. Exclusion of large deletions and other rearrangements in BRCA1 and BRCA2 in Finnish breast and ovarian cancer families. *Cancer Genet Cytogenet.* 2001; 129:120–23. [https://doi.org/10.1016/S0165-4608\(01\)00437-X](https://doi.org/10.1016/S0165-4608(01)00437-X).
  13. Agata S, Dalla Palma M, Callegaro M, Scaini MC, Menin C, Ghiotto C, Nicoletto O, Zavagno G, Chieco-Bianchi L, D'Andrea E, Montagna M. Large genomic deletions inactivate the BRCA2 gene in breast cancer families. *J Med Genet.* 2005; 42:e64. <https://doi.org/10.1136/jmg.2005.032789>.
  14. Woodward AM, Davis TA, Silva AG, Kirk JA, Leary JA, and kConFab Investigators. Large genomic rearrangements of both BRCA2 and BRCA1 are a feature of the inherited breast/ovarian cancer phenotype in selected families. *J Med Genet.* 2005; 42:e31. <https://doi.org/10.1136/jmg.2004.027961>.
  15. Peixoto A, Santos C, Rocha P, Pinheiro M, Príncipe S, Pereira D, Rodrigues H, Castro F, Abreu J, Gusmão L, Amorim A, Teixeira MR. The c.156\_157insAlu BRCA2 rearrangement accounts for more than one-fourth of deleterious BRCA mutations in northern/central Portugal. *Breast Cancer Res Treat.* 2009; 114:31–38. <https://doi.org/10.1007/s10549-008-9978-4>.
  16. Smith TM, Lee MK, Szabo CI, Jerome N, McEuen M, Taylor M, Hood L, King MC. Complete genomic sequence and analysis of 117 kb of human DNA containing the gene BRCA1. *Genome Res.* 1996; 6:1029–49. <https://doi.org/10.1101/gr.6.11.1029>.
  17. Thompson D, Easton D. The genetic epidemiology of breast cancer genes. *J Mammary Gland Biol Neoplasia.* 2004; 9:221–36. <https://doi.org/10.1023/B:JOMG.0000048770.90334.3b>.
  18. Zhang J, Fackenthal JD, Huo D, Zheng Y, Olopade OI. Searching for large genomic rearrangements of the BRCA1 gene in a Nigerian population. *Breast Cancer Res Treat.* 2010; 124:573–77. <https://doi.org/10.1007/s10549-010-1006-9>.
  19. Judkins T, Rosenthal E, Arnell C, Burbidge LA, Geary W, Barrus T, Schoenberger J, Trost J, Wenstrup RJ, Roa BB. Clinical significance of large rearrangements in BRCA1 and BRCA2. *Cancer.* 2012; 118:5210–16. <https://doi.org/10.1002/cncr.27556>.
  20. Seong MW, Cho SI, Kim KH, Chung IY, Kang E, Lee JW, Park SK, Lee MH, Choi DH, Yom CK, Noh WC, Chang MC, Park SS, Kim SW, and Korean Hereditary Breast Cancer Study Group. A multi-institutional study of the prevalence of BRCA1 and BRCA2 large genomic rearrangements in familial breast cancer patients. *BMC Cancer.* 2014; 14:645. <https://doi.org/10.1186/1471-2407-14-645>.
  21. Concolino P, Rizza R, Mignone F, Costella A, Guarino D, Carboni I, Capoluongo E, Santonocito C, Urbani A, Minucci A. A comprehensive BRCA1/2 NGS pipeline for an immediate Copy Number Variation (CNV) detection in breast and ovarian cancer molecular diagnosis. *Clin Chim Acta.* 2018; 480:173–79. <https://doi.org/10.1016/j.cca.2018.02.012>.
  22. Pinkel D, Albertson DG. Array comparative genomic hybridization and its applications in cancer. *Nat Genet.* 2005; 37:S11–17. <https://doi.org/10.1038/ng1569>.
  23. Schouten JP, McElgunn CJ, Waaijer R, Zwijnenburg D, Diepvens F, Pals G. Relative quantification of 40 nucleic acid sequences by multiplex ligation-dependent probe amplification. *Nucleic Acids Res.* 2002; 30:e57. <https://doi.org/10.1093/nar/gnf056>.
  24. Concolino P, Mello E, Minucci A, Santonocito C, Scambia G, Giardina B, Capoluongo E. Advanced tools for BRCA1/2 mutational screening: comparison between two methods for large genomic rearrangements (LGRs) detection. *Clin Chem Lab Med.* 2014; 52:1119–27. <https://doi.org/10.1515/cclm-2013-1114>.
  25. Saxena D, Agarwal M, Gupta D, Agrawal S, Das V, Phadke SR. Utility and limitations of multiplex ligation-dependent probe amplification technique in the detection of cytogenetic abnormalities in products of conception. *J Postgrad Med.* 2016; 62:239–41. <https://doi.org/10.4103/0022-3859.192664>.

26. Kwong A, Chen J, Shin VY, Ho JC, Law FB, Au CH, Chan TL, Ma ES, Ford JM. The importance of analysis of long-range rearrangement of BRCA1 and BRCA2 in genetic diagnosis of familial breast cancer. *Cancer Genet.* 2015; 208:448–54. <https://doi.org/10.1016/j.cancergen.2015.05.031>.
27. Wallace AJ. New challenges for BRCA testing: a view from the diagnostic laboratory. *Eur J Hum Genet.* 2016; 24:S10–18. <https://doi.org/10.1038/ejhg.2016.94>.
28. Schenkel LC, Kerkhof J, Stuart A, Reilly J, Eng B, Woodside C, Levstik A, Howlett CJ, Rupar AC, Knoll JH, Ainsworth P, Waye JS, Sadikovic B. Clinical Next-Generation Sequencing Pipeline Outperforms a Combined Approach Using Sanger Sequencing and Multiplex Ligation-Dependent Probe Amplification in Targeted Gene Panel Analysis. *J Mol Diagn.* 2016; 18:657–67. <https://doi.org/10.1016/j.jmoldx.2016.04.002>.
29. Schmidt AY, Hansen TV, Ahlborn LB, Jønson L, Yde CW, Nielsen FC. Next-Generation Sequencing-Based Detection of Germline Copy Number Variations in BRCA1/BRCA2: Validation of a One-Step Diagnostic Workflow. *J Mol Diagn.* 2017; 19:809–16. <https://doi.org/10.1016/j.jmoldx.2017.07.003>.
30. Scaglione GL, Concolino P, De Bonis M, De Paolis E, Minucci A, Ferrandina G, Scambia G, Capoluongo E. A Whole Germline BRCA2 Gene Deletion: How to Learn from CNV In Silico Analysis. *Int J Mol Sci.* 2018; 19:E961. <https://doi.org/10.3390/ijms19040961>.
31. Hirotsu Y, Ooka Y, Sakamoto I, Nakagomi H, Omata M. Simultaneous detection of genetic and copy number alterations in BRCA1/2 genes. *Oncotarget.* 2017; 8:114463–73. <https://doi.org/10.18632/oncotarget.22962>.
32. Ruiz A, Llort G, Yagüe C, Baena N, Viñas M, Torra M, Brunet A, Seguí MA, Saigi E, Guitart M. Genetic testing in hereditary breast and ovarian cancer using massive parallel sequencing. *Biomed Res Int.* 2014; 2014:542541. <https://doi.org/10.1155/2014/542541>.
33. Papadimitriou M, Mountzios G, Papadimitriou CA. The role of PARP inhibition in triple-negative breast cancer: Unraveling the wide spectrum of synthetic lethality. *Cancer Treat Rev.* 2018; 67:34-44. <https://doi.org/10.1016/j.ctrv.2018.04.010>.
34. Morgan RD, Clamp AR, Evans DG, Edmondson RJ, Jayson GC. PARP inhibitors in platinum-sensitive high-grade serous ovarian cancer. *Cancer Chemother Pharmacol.* 2018; 81:647-658. <https://doi.org/10.1007/s00280-018-3532-9>.
